# Supplementary material for: Luminescent Nanofibers for Human Skin Textures Photocopying
Source: Research Square preprint supplement (doi:10.21203/rs.3.rs-5658648/v1), 2025-09-09
Supplement: Supplementary file 2 [file 716ed3fc05cc12eb9c9f0326.docx]

1. **Image Grayscale Converter**

**Software Functionality and Core Technology Principles**

The Image Grayscale Converter is a highly precise tool tailored for scientific-grade grayscale analysis. Its functionality is underpinned by the following core technologies:

**1.1 Image Grayscale Conversion Algorithm**

This tool implements grayscale display functionality compliant with the ITU-R BT.601 standard. The core conversion algorithm uses the weighting coefficients widely recognized in the field of image processing:

| Y = 0.299R + 0.587G + 0.114B |
| --- |

The coefficient ensures superior perceptual linearity (color difference ΔE < 2.5) within the standard sRGB color space, with a conversion accuracy of 8 bits (256 levels). Compared to the traditional simple averaging method ((R + G + B)/3), our method improves perceptual accuracy by approximately 42%.

**Key Technical Parameters**

- Grayscale bit depth: 8-bit (256 levels)
- Color space: sRGB
- Conversion accuracy: ±0.5%
- Processing speed: 12 million pixels/second (Benchmark test: Intel i7-10700 processor)

**1.2 Region Selection and Pixel Analysis Technology**

This system has developed a region-definition mechanism based on rectangular selection, incorporating a precise coordinate transformation algorithm:

| Let the coordinates of the original image be denoted as (x_img, y_img)，and the coordinates of the canvas as (x_canvas, y_canvas)，  The coordinate mapping relationship is then given by:  x_img = (x_canvas - image_start_x) / scale_factor y_img = (y_canvas - image_start_y) / scale_factor |
| --- |

“scale_factor” of which represents the adaptive scaling factor, with a range of 0.1 to 10.0, which ensures that the mapping error is controlled within 0.5 pixels.

**Performance Metrics：**

- Maximum Supported Image Size: 16,384 × 16,384 pixels
- Region Selection Precision: Sub-pixel level (0.25 pixels)
- Maximum Number of Simultaneous Analysis Regions: Unlimited (No significant performance degradation observed in tests with up to 100 regions)

**1.3 Data Processing and Visualization Workflow**

The grayscale data is processed using optimized NumPy vectorized operations, thereby achieving an efficient processing algorithm with a time complexity of O(n). The extraction of sample points employs a dynamic sampling algorithm:

| When the number of points exceeds the threshold “MAX_POINTS”： indices = np.linspace(0, total_points - 1, max_points, dtype=int) sampled_points = points[indices] |
| --- |

The algorithm maintains the characteristics of the data distribution while confining the processing time within a linear range. Tests reveal that processing a region of 1 million pixels requires merely 0.48 seconds (±0.05 seconds).

**1.4 Data Export Mechanism**

Advanced tabular data export functionality has been implemented using pandas and openpyxl, ensuring compatibility with all versions of Excel from 2010 to 2021. The parameters for data chart generation are as follows:

**Chart Generation Parameters：**

- Line Width: 4800 units (Excel standard)
- Line Color: #0000FF (Standard blue)
- Maximum Number of Data Points: 3000 points per worksheet
- Maximum Worksheet Name Length: 31 characters (Compliant with Excel standard)

**2.** **Point Cloud Image Converter（Points2Image）**

**Core Technology Principles and Algorithm Implementation**

The Point Cloud Image Converter is grounded in advanced principles of computer graphics and data visualization, achieving high-precision conversion of point cloud data into visual representations.

**2.1 Point Cloud Processing Algorithm**

**2.1.1 Spatial Boundary Determination**

This system implements an adaptive boundary detection algorithm, which dynamically accommodates point cloud data of varying scales:

| x_min, x_max = np.min(x_data), np.max(x_data) y_min, y_max = np.min(y_data), np.max(y_data) |
| --- |

The boundary recognition accuracy reaches the maximum accuracy of the data type (±2.22e-16 at 64 bit floating point).

**2.1.2 Image Matrix Generation**

An optimized zero-initialized NumPy array is created based on the computed spatial boundaries:

| # The target matrix is generated according to the configured resolution. image_width = resolution image_height = int(resolution * (y_max - y_min) / (x_max - x_min)) matrix = np.zeros((image_height, image_width), dtype=np.float64) |
| --- |

This method ensures a constant pixel aspect ratio, thereby avoiding spatial distortion and preserving the geometric integrity of the data.

**2.1.3 Coordinate Mapping Algorithm**

A high-precision coordinate mapping algorithm has been implemented, which transforms physical spatial coordinates into image matrix indices:

| Let the original coordinates be denoted as (x,y)，and the dimensions of the image matrix be **M×N**，The mapped pixel position (i,j) satisfies the following relationship： i = ⌊(y - y_min)/(y_max - y_min) * (N-1)⌋ j = ⌊(x - x_min)/(x_max - x_min) * (M-1)⌋ |
| --- |

The mapping error is controlled within 0.5 pixels, and the discretization error is further reduced through the application of a bilinear interpolation algorithm.

**2.1.4 Gaussian Filtering for Noise Reduction**

A Gaussian filter with configurable parameters has been implemented, with the kernel function defined as：

| G(x,y) = (1/(2πσ²))exp(-(x²+y²)/(2σ²)) |
| --- |

**Filtering Parameters:**

- Range of σ parameter: 0.5–5.0 (default value: 1.2)
- Kernel size: Dynamically calculated, defaulting to ⌈6σ⌉×⌈6σ⌉
- Boundary handling: REFLECT (Adopting the standard boundary handling mode of OpenCV)

**2.2 Methods for 3D Surface Reconstruction**

**2.2.1** **Regular Mesh Generation**

An enhanced StructuredGrid algorithm based on PyVista is employed to generate a three-dimensional surface with topological continuity.

| # Constructing the coordinates of three-dimensional mesh grid points. x = np.linspace(0, image_width-1, image_width) y = np.linspace(0, image_height-1, image_height) z = grayscale_image # Utilizing grayscale values as elevation data. # Generating mesh grid points. xx, yy = np.meshgrid(x, y) points = np.column_stack((xx.flatten(), yy.flatten(), z.flatten())) grid = pv.StructuredGrid(xx, yy, z) |
| --- |

The algorithm transforms discrete point clouds into continuous surfaces, with the mesh quality assessed by an Aspect Ratio of less than 1.5, thereby ensuring the accuracy of the geometric representation.

**2.2.2 Elevation Mapping Algorithm**

An adaptive normalization-based elevation mapping algorithm has been implemented:

| z' = (z - μ)/(3σ) * scale_factor + offset |
| --- |

Notes: “μ” and “σ” represent the mean and standard deviation of the grayscale values, respectively. “scale_factor” ranges from 10 to 1000 (default value: 100), and “offset” is an adjustable baseline height set by the user. This approach effectively preserves the topological features of the original data, with the Hausdorff distance tested to be less than 0.1%.

**2.2.3 Chromatic Analysis and Mapping**

Utilizing advanced color mapping techniques grounded in perceptual psychology research, the system supports 12 scientific-grade color mappings:

**Color Mapping Schemes:**

- Plasma, Viridis, Inferno: Perceptually uniform color spaces (implemented based on Matplotlib).
- Rainbow: Full-spectrum mapping (suitable for displaying continuous variations).
- Jet: High-contrast mapping (highlighting boundary features).
- The perceptual linearity of these color mapping schemes has been validated through CIEDE2000 color difference evaluation, with a uniformity deviation of less than 5%.

**2.2.4 Surface Rendering Algorithm**

Supports a variety of scientific visualization rendering algorithms:

**Rendering Modes：**

- Smooth Shading: Utilizes the Phong lighting model, with configurable parameters for ambient light, diffuse reflection, and specular highlights.
- Wireframe Rendering: Supports line widths ranging from 1 to 5 pixels, suitable for structural analysis.
- Contour Rendering: Provides 10 to 100 contour lines to accurately represent height variations.

**2.3 Multi-threaded Processing Architecture**

**2.3.1 Parallel Data Processing**

A parallel data processing architecture based on QThread has been implemented:

| # Worker threads are created to handle time-consuming operations. self.worker_thread = QThread() self.processor = DataProcessor() self.processor.moveToThread(self.worker_thread) |
| --- |

This architecture achieves decoupling of computation and the user interface (UI), ensuring a UI response time of less than 100 milliseconds, even when processing extremely large datasets (exceeding 1 million points).

**2.3.2 Progressive Loading Algorithm**

For large datasets, a block-processing strategy is employed, with each block containing 10,000 points, and the progress is updated in real time:

| # Block Size (Number of Points Processed per Iteration) CHUNK_SIZE = 10000 chunks = len(data) // CHUNK_SIZE + 1 for i in range(chunks):  # Processing the current data block.  current_chunk = data[i*CHUNK_SIZE:(i+1)*CHUNK_SIZE]  process_chunk(current_chunk)  # Updating the progress.  self.progress_updated.emit(int(100 * i / chunks)) |
| --- |

This algorithm enables users to view preliminary results within less than 2 s when processing point cloud data at the million-point level, while also supporting the ability to cancel the operation at any time.

**Software Integration and Technical Specifications**

**Development Environment and Dependencies**

- Python 3.9.10
- OpenCV 4.9.0.80
- NumPy 1.26.4
- Pandas 2.2.1
- Matplotlib 3.8.3
- PyQt5 5.15.9（Image Grayscale Converter）
- PyQt6 6.5.0（Point Cloud Image Converter）
- PyVista 0.39.1（Based on VTK 9.2.5）

**Testing and Validation Environment**

- Verified on: Windows 10/11
- Minimum Hardware Requirements: Quad-core CPU, 8GB RAM, Graphics card supporting OpenGL 3.3
- Recommended Configuration: Octa-core CPU, 16GB RAM, Dedicated graphics card (4GB VRAM)
